# Supplementary material for: The Gut Microbiome Was Associated With Brain Structure and Function in Schizophrenia
Source: Research Square preprint supplement (doi:10.21203/rs.3.rs-181659/v1), 2021-02-11
Supplement: Supplementary file 2 [file 973be3927bf1fef8d0101e28.docx]

**Association between the gut microbiome and functional brain activity in schizophrenia-Supplementary Materials**

Shijia Li a, c, e, †, Jie Song a, c, e, †, Pengfei Ke a, c, e, Lingyin Kong a, c, e, Bingye Lei a, c, e, Jing Zhou a, c, e, Yuanyuan Huang b, c, Hehua Li b, c, Guixiang Li d, g, Jun Chen d, g, Xiaobo Li c, h, Zhiming Xiang d, I, Yuping Ning b, c, Fengchun Wu b, c, *and Kai Wu a,b,c,d,e,f,g,j,*

a Department of Biomedical Engineering, School of Material Science and Engineering, South China University of Technology, Guangzhou 510006, China

b The Affiliated Brain Hospital of Guangzhou Medical University, Guangzhou Huiai Hospital, Guangzhou 510370, China

c Guangdong Engineering Technology Research Center for Translational Medicine of Mental Disorders, Guangzhou 510370, China

d Guangdong Engineering Technology Research Center for Diagnosis and Rehabilitation of Dementia, Guangzhou 510500, China

e National Engineering Research Center for Tissue Restoration and Reconstruction, South China University of Technology, Guangzhou 510006, China

f Key Laboratory of Biomedical Engineering of Guangdong Province, South China University of Technology, Guangzhou 510006, China

g National Engineering Research Center for Healthcare Devices, Guangzhou 510500, China

h Department of Biomedical Engineering, New Jersey Institute of Technology, Newark, NJ, U.S.

i Department of Radiology, Panyu Central Hospital of Guangzhou, Guangzhou 511400, China

j Department of Nuclear Medicine and Radiology, Institute of Development, Aging and Cancer, Tohoku University, Sendai 980-8575, Japan

† Shi-jia Li and Jie Song contributed equally to this work.

* Corresponding authors: [kaiwu@scut.edu.cn](mailto:kaiwu@scut.edu.cn) (K. Wu.); [13580380071@163.com](mailto:13580380071@163.com) (F.-c. Wu).

Supplementary Table S1. Alpha diversity in the NC and SZ groups

| Alpha diversity | NC group | SZ group | *p* value |
| --- | --- | --- | --- |
| Shannon | 4.34±0.70 | 4.17±0.75 | 0.29 |
| Evenness | 0.65±0.08 | 0.64±0.09 | 0.68 |
| Faith’s phylogenetic diversity | 8.06±2.04 | 7.72±1.96 | 0.45 |
| Observed features | 103.47±34.11 | 95.78±32.54 | 0.41 |

**Notes:** NC, normal control; SZ, schizophrenia.

Supplementary Table S2. Difference of MRI indexes between the NC and SZ groups

| MRI | Index | Regions | NC group | SZ group | *p* value* |
| --- | --- | --- | --- | --- | --- |
| GMV | 11 | Frontal_Inf_Oper_L | 0.42±0.04 | 0.39±0.05 | 0.04 |
| 25 | Frontal_Mid_Orb_L | 0.45±0.05 | 0.41±0.07 | 0.02 |
| 29 | Insula_L | 0.54±0.04 | 0.50±0.06 | 0.03 |
| 30 | Insula_R | 0.56±0.04 | 0.53±0.06 | 0.03 |
| 41 | Amygdala_L | 0.64±0.05 | 0.61±0.07 | 0.03 |
| 44 | Calcarine_R | 0.43±0.05 | 0.40±0.06 | 0.04 |
| 49 | Occipital_Sup_L | 0.33±0.03 | 0.31±0.04 | 0.04 |
| 51 | Occipital_Mid_L | 0.42±0.03 | 0.39±0.05 | 0.03 |
| 58 | Postcentral_R | 0.32±0.03 | 0.30±0.04 | 0.04 |
| 73 | Putamen_L | 0.45±0.06 | 0.42±0.07 | 0.05 |
| 74 | Putamen_R | 0.43±0.05 | 0.40±0.06 | 0.01 |
| 77 | Thalamus_L | 0.41±0.03 | 0.39±0.04 | 0.03 |
| 78 | Thalamus_R | 0.44±0.03 | 0.41±0.05 | 0.04 |
| 83 | Temporal_Pole_Sup_L | 0.33±0.03 | 0.31±0.04 | 0.01 |
| 84 | Temporal_Pole_Sup_R | 0.34±0.03 | 0.31±0.04 | 0.01 |
| 90 | Temporal_Inf_R | 0.49±0.05 | 0.46±0.07 | 0.03 |
| ReHo | 1 | Precentral_L | 0.43±0.04 | 0.41±0.06 | 0.05 |
| 13 | Frontal_Inf_Tri_L | 0.47±0.03 | 0.45±0.05 | 0.03 |
| 14 | Frontal_Inf_Tri_R | 0.46±0.03 | 0.44±0.06 | 0.05 |
| 2 | Precentral_R | 0.44±0.04 | 0.42±0.05 | 0.05 |
| 25 | Frontal_Mid_Orb_L | 0.52±0.05 | 0.49±0.06 | 0.02 |
| 26 | Frontal_Mid_Orb_R | 0.51±0.04 | 0.48±0.06 | 0.004 |
| 27 | Rectus_L | 0.48±0.08 | 0.44±0.05 | 0.01 |
| 28 | Rectus_R | 0.48±0.07 | 0.44±0.05 | 0.01 |
| 43 | Calcarine_L | 0.55±0.08 | 0.50±0.08 | 0.003 |
| 44 | Calcarine_R | 0.54±0.07 | 0.49±0.08 | 0.01 |
| 45 | Cuneus_L | 0.55±0.06 | 0.51±0.07 | 0.01 |
| 46 | Cuneus_R | 0.54±0.05 | 0.51±0.07 | 0.02 |
| 47 | Lingual_L | 0.50±0.06 | 0.45±0.07 | 0.004 |
| 48 | Lingual_R | 0.50±0.06 | 0.45±0.08 | 0.002 |
| 49 | Occipital_Sup_L | 0.47±0.04 | 0.44±0.07 | 0.01 |
| 5 | Frontal_Sup_Orb_L | 0.45±0.06 | 0.43±0.06 | 0.04 |
| 50 | Occipital_Sup_R | 0.50±0.04 | 0.46±0.07 | 0.01 |
| 51 | Occipital_Mid_L | 0.51±0.04 | 0.48±0.06 | 0.01 |
| 52 | Occipital_Mid_R | 0.53±0.04 | 0.50±0.07 | 0.01 |
| 53 | Occipital_Inf_L | 0.49±0.05 | 0.45±0.07 | 0.01 |
| 54 | Occipital_Inf_R | 0.52±0.06 | 0.47±0.08 | 0.002 |
| 57 | Postcentral_L | 0.43±0.05 | 0.40±0.06 | 0.01 |
| 58 | Postcentral_R | 0.46±0.05 | 0.42±0.07 | 0.002 |
| 59 | Parietal_Sup_L | 0.46±0.05 | 0.43±0.06 | 0.01 |
| 6 | Frontal_Sup_Orb_R | 0.45±0.05 | 0.42±0.05 | 0.02 |
| 60 | Parietal_Sup_R | 0.47±0.04 | 0.44±0.06 | 0.003 |
| 61 | Parietal_Inf_L | 0.46±0.04 | 0.43±0.06 | 0.04 |
| 62 | Parietal_Inf_R | 0.51±0.04 | 0.48±0.06 | 0.01 |
| 67 | Precuneus_L | 0.54±0.04 | 0.51±0.06 | 0.04 |
| 71 | Caudate_L | 0.37±0.02 | 0.39±0.06 | 0.05 |
| 8 | Frontal_Mid_R | 0.48±0.03 | 0.46±0.06 | 0.03 |
| 81 | Temporal_Sup_L | 0.45±0.04 | 0.42±0.06 | 0.03 |
| 82 | Temporal_Sup_R | 0.48±0.04 | 0.45±0.05 | 0.03 |
| 86 | Temporal_Mid_R | 0.49±0.03 | 0.46±0.05 | 0.02 |
| ALFF | 72 | Caudate_R | 0.76±0.15 | 0.93±0.5 | 0.04 |

**Notes:** GMV, gray matter volume; ReHo, regional homogeneity, ALFF, amplitude of low-frequency fluctuation; NC, normal control; SZ, schizophrenia; Mid, middle; Inf, inferior; Oper, operculum; Tri, triangularis; Orb, orbitalis; Sup, superior; L (R), left (right) hemisphere; **p* < 0.05.

Supplementary Table S3. Relationship between the diversity of microbiome and MRI indexes

| Alpha diversity | Regions | *r* | *p* value* | *p­* value** |
| --- | --- | --- | --- | --- |
| Observed species | Postcentral_R | 0.41 | 0.011 | 0.024 |
| Insula_R | 0.41 | 0.012 | 0.026 |
| Insula_L | 0.40 | 0.016 | 0.032 |
| Faith_PD | Insula_L | 0.45 | 0.005 | 0.013 |
| Insula_R | 0.45 | 0.005 | 0.013 |
| Postcentral_R | 0.42 | 0.010 | 0.023 |
| Frontal_Inf_Oper_L | 0.40 | 0.015 | 0.030 |
| Evenness | Calcarine_R | 0.59 | 0.000 | 0.000 |
| Calcarine_L | 0.49 | 0.002 | 0.003 |
| Lingual_R | 0.48 | 0.003 | 0.004 |
| Occipital_Sup_L | 0.48 | 0.003 | 0.004 |
| Lingual_L | 0.47 | 0.003 | 0.004 |
| Cuneus_R | 0.40 | 0.013 | 0.017 |
| Occipital_Inf_L | 0.38 | 0.020 | 0.025 |
| Parietal_Sup_L | 0.38 | 0.021 | 0.027 |
| Occipital_Inf_R | 0.37 | 0.025 | 0.032 |
| Postcentral_L | 0.36 | 0.028 | 0.036 |
| Parietal_Sup_R | 0.36 | 0.028 | 0.036 |
| Shannon | Calcarine_R | 0.56 | 0.000 | 0.000 |
| Calcarine_L | 0.47 | 0.003 | 0.004 |
| Lingual_L | 0.43 | 0.008 | 0.011 |
| Occipital_Sup_L | 0.42 | 0.010 | 0.013 |
| Lingual_R | 0.42 | 0.010 | 0.013 |
| Parietal_Sup_R | 0.36 | 0.031 | 0.039 |

**Notes:** Sup, superior; Inf, inferior, L (R), left (right) hemisphere; **p* < 0.05, ***p* < 0.05 with FDR correction.
